# Supplementary material for: Diversity and Hydrocarbon-Degrading Potential of Deep-Sea Microbial Community from the Mid-Atlantic Ridge, South of the Azores (North Atlantic Ocean)
Source: MDPI journal article supplement (doi:10.3390/microorganisms9112389), 2021-11-19
Supplement: s1 [file s1]

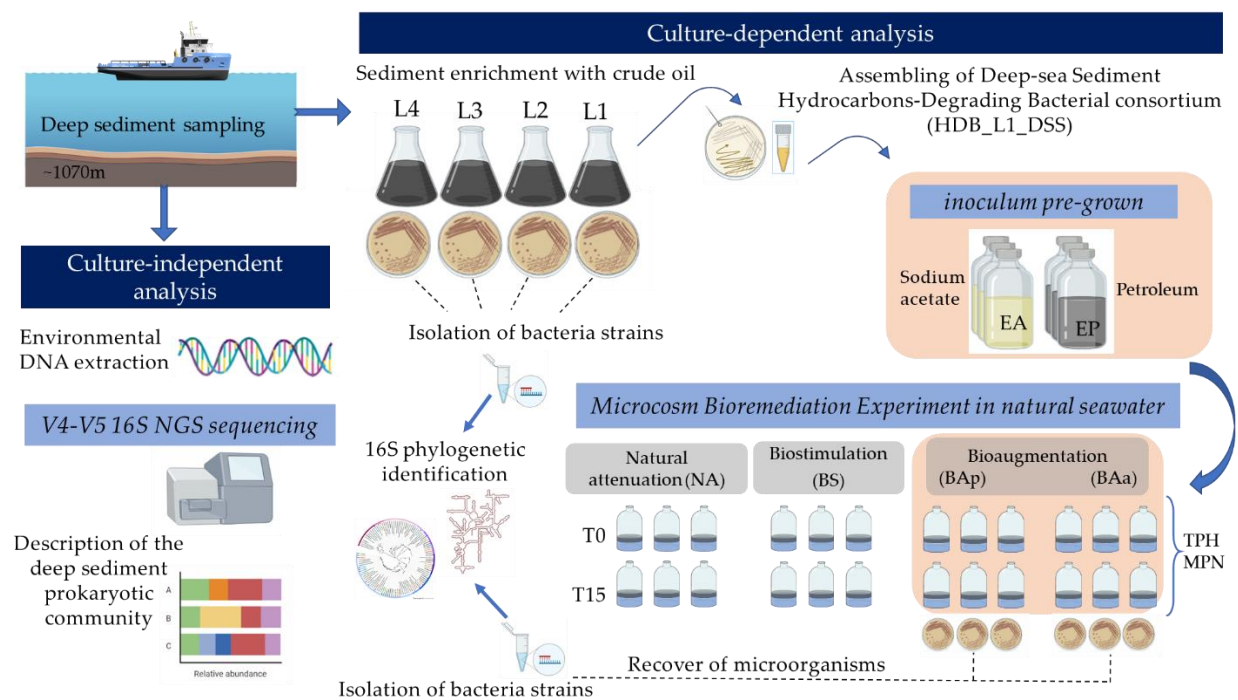

**Figure S1.** Workflow.

**Table S1.** Summary statistics of 16S rRNA gene amplicon sequencing.

| <b>Sample ID</b> | <b># Sequences</b> | <b># OTUs<sup>a</sup><br/>(%)</b> | <b>#Classified (%)</b> | <b># No<br/>Relative (%)</b> | <b># Rejected<br/>(%)</b> |
|------------------|--------------------|-----------------------------------|------------------------|------------------------------|---------------------------|
| <b>L1</b>        | 46,874             | 10,320<br>(22.02)                 | 42,879 (91.48)         | 531 (1.13)                   | 3,464 (7.39)              |
| <b>L2</b>        | 31,328             | 4,788<br>(15.28)                  | 28,545 (91.12)         | 352 (1.12)                   | 2,431 (7.76)              |
| <b>L3</b>        | 86,322             | 17,180<br>(19.90)                 | 71,911 (83.31)         | 989 (1.15)                   | 13,422 (15.55)            |
| <b>L4</b>        | 74,883             | 13,785<br>(18.41)                 | 71,080 (94.92)         | 727 (0.97)                   | 3,076 (4.11)              |

<sup>a</sup>Operational taxonomic unit at 2% sequence dissimilarity

a

| Samples | Number of OTUs | Number of Sequences Observed Once | bc-chao-1 | Good's coverage | Shannon | Simpson |
|---------|----------------|-----------------------------------|-----------|-----------------|---------|---------|
| L1      | 10,320         | 5,651                             | 20,659    | 0.7             | 4.53    | 0.025   |
| L2      | 4,788          | 2,111                             | 9,872     | 0.8             | 4.51    | 0.024   |
| L3      | 17,180         | 11,320                            | 54,645    | 0.65            | 4.38    | 0.026   |
| L4      | 13,785         | 6,241                             | 23,377    | 0.8             | 4.48    | 0.026   |

b

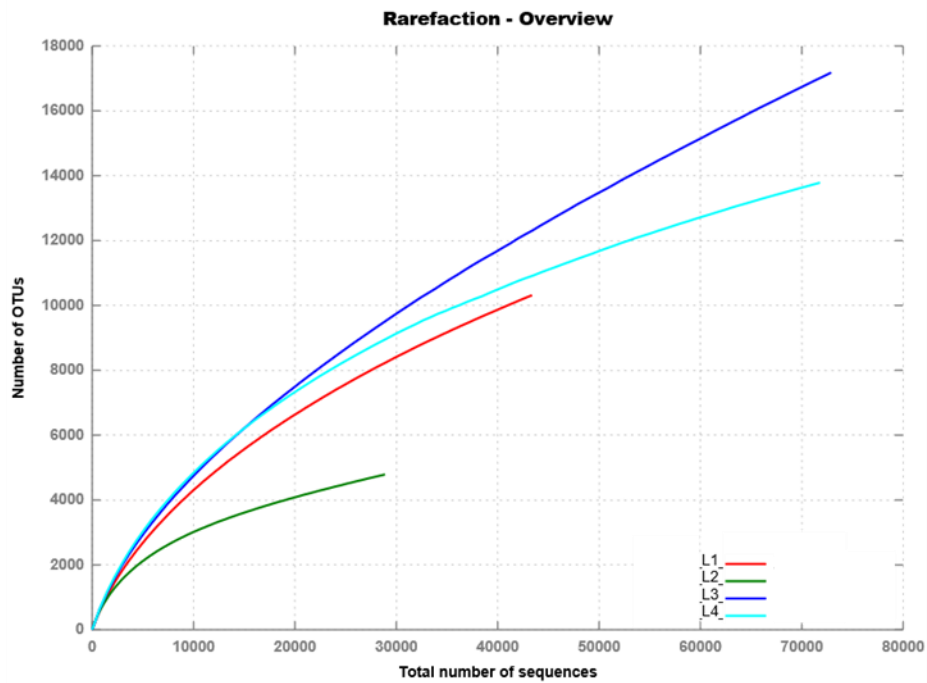

**Figure S2.** Alpha diversity a) alpha diversity table reporting the number of OTUs, Number of sequences observed once (singletons), bc-chao1 (index Bias-corrected Chao1 species richness estimator), good coverage per sample, Shannon-Wiener Index, and Simpson's evenness Index; b) rarefaction curves.

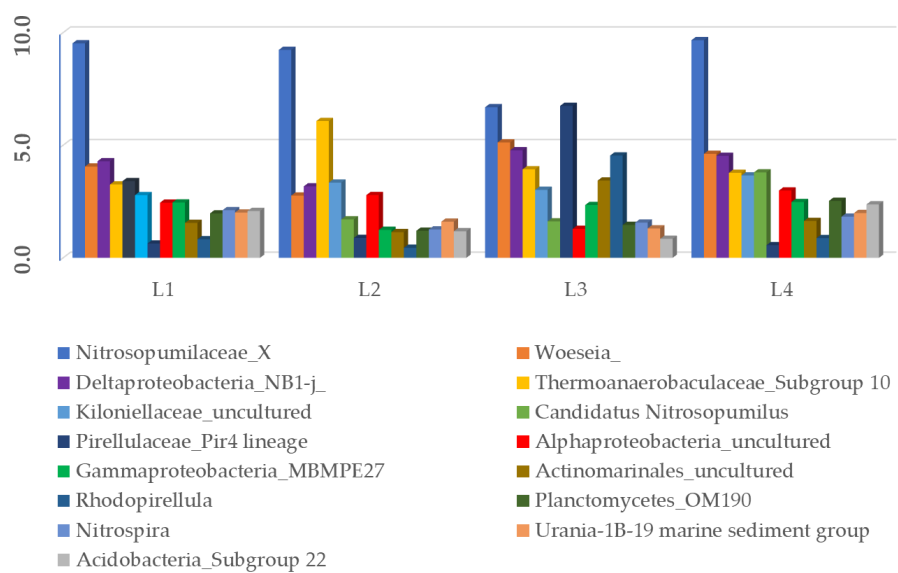

**Figure S3.** Top 15 genera detected in DSS prokaryotic community.

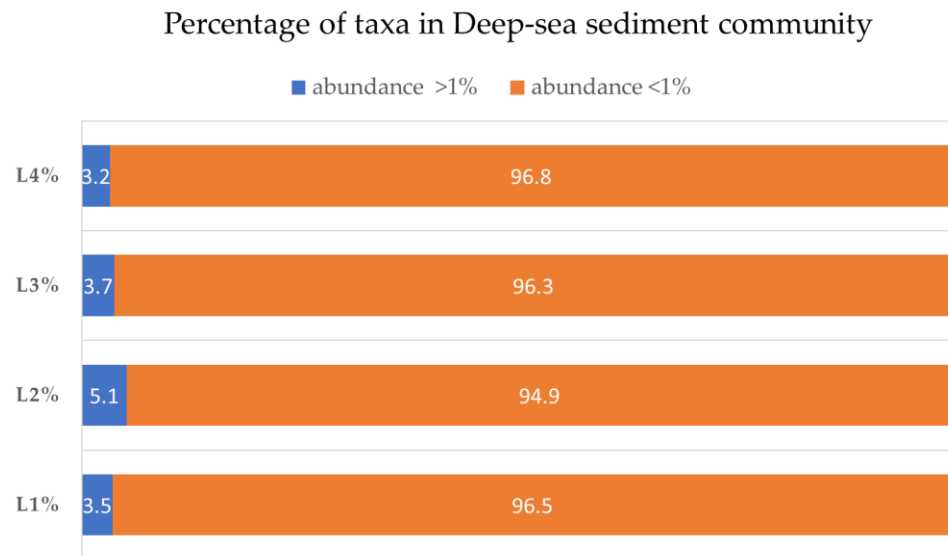

**Figure S4.** Percentage of taxa detected in Deep-sea sediment community. In blue is reported the percentage of taxa with an abundance >1%; in orange is reported the percentage of taxa with an abundance <1%.
